# Supplementary material for: Nuclear-enriched abundant transcript 1 as a diagnostic and prognostic biomarker in colorectal cancer
Source: PubMed Central journal article supplement (PMC4640217; doi:10.1186/s12943-015-0455-5), 2015-11-09
Supplement: 12943_2015_455_MOESM1_ESM.pdf [file 12943_2015_455_MOESM1_ESM.pdf]

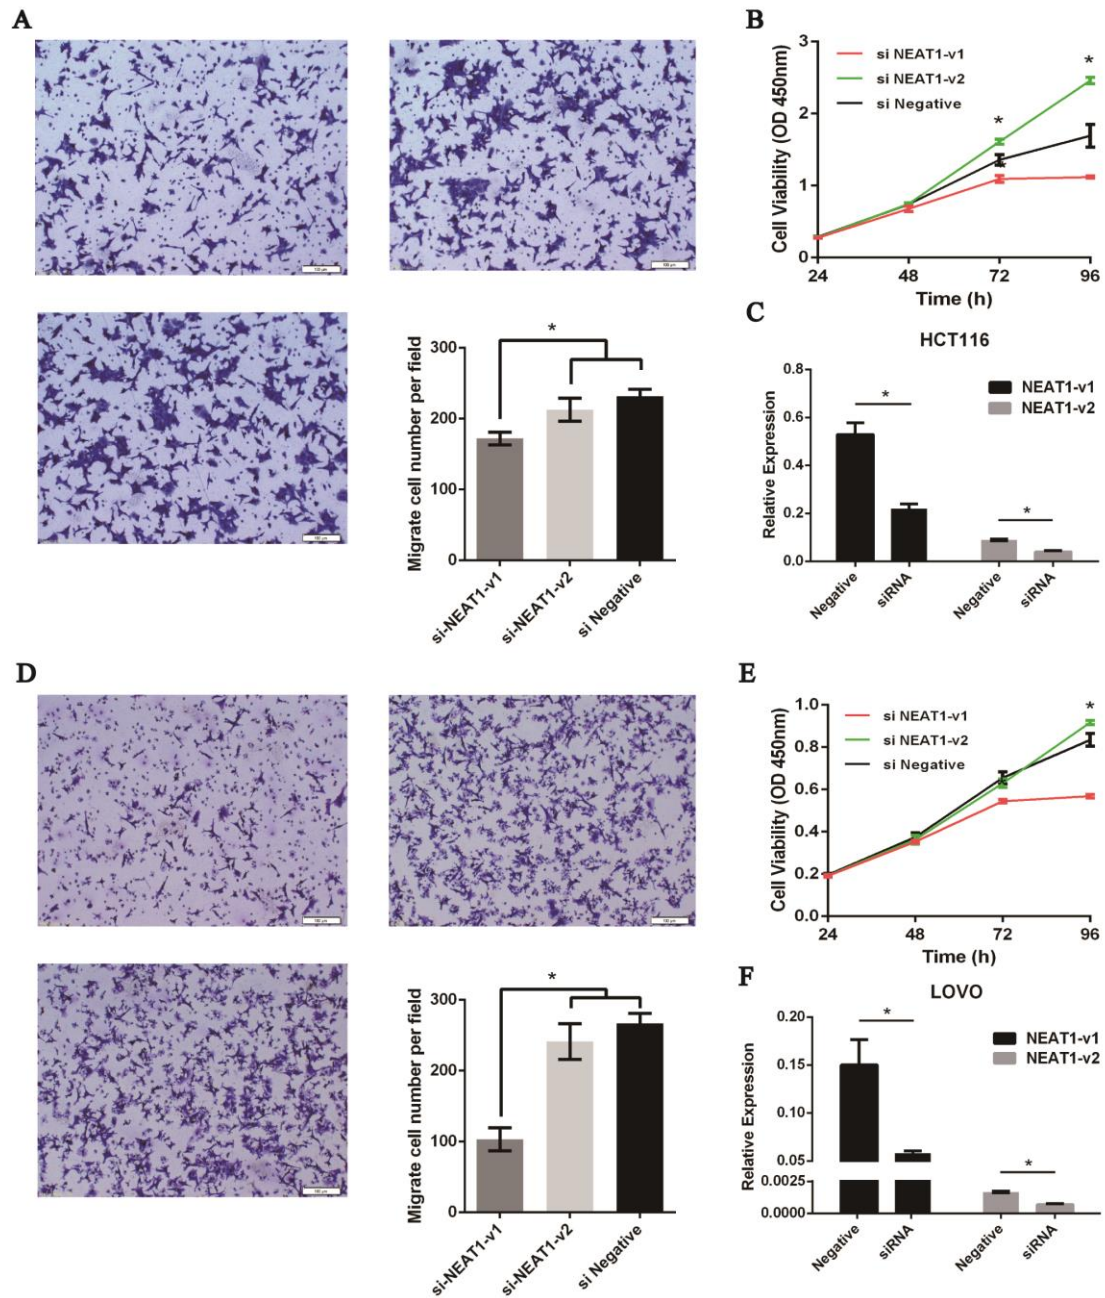

**Figure S1. Functional assays of NEAT1 on colorectal cancer cells.** A and D, Transwell invasion assay demonstrated weakened invasive capacity of HCT116 and LOVO cell lines after NEAT1\_v1 knockdown. Images of cells were taken at 100 $\mu$ m. B and E, CCK8 assays demonstrated that cell growth of HCT116 and LOVO was significantly inhibited when treated with NEAT1\_v1 siRNA at 72 to 96 hours and 96 hours respectively, compared with controls. Reverse result was detected when cell lines were treated with NEAT1\_v2 siRNA. C and F, All knockdown efficiency was confirmed in cell lines. \*  $P < 0.05$
