# Supplementary material for: Nuclear-enriched abundant transcript 1 as a diagnostic and prognostic biomarker in colorectal cancer
Source: PubMed Central journal article supplement (PMC4640217; doi:10.1186/s12943-015-0455-5), 2015-11-09
Supplement: 12943_2015_455_MOESM2_ESM.pdf [file 12943_2015_455_MOESM2_ESM.pdf]

**Table S1. Correlation of NEAT1 expression between blood and matched tissues.**

| <b>Correlation of NEAT1 expression between blood and matched tissues</b> |                      |                 |                           |                 |
|--------------------------------------------------------------------------|----------------------|-----------------|---------------------------|-----------------|
|                                                                          | <b>Tumor Tissues</b> |                 | <b>Para-Tumor Tissues</b> |                 |
|                                                                          | <b>NEAT1_v1</b>      | <b>NEAT1_v2</b> | <b>NEAT1_v1</b>           | <b>NEAT1_v2</b> |
| <b>Blood</b>                                                             |                      |                 |                           |                 |
| <b>p value</b>                                                           | 0.733                | 0.475           | 0.764                     | 0.771           |
| <b>Pearson correlation</b>                                               | 0.066                | -0.138          | 0.058                     | 0.057           |

Blood and matched tissues were collected from 29 patients (Stage I-IV). Correlation analysis was performed. Pearson correlation and p-value was present in the table.
