# Supplementary material for: Nuclear-enriched abundant transcript 1 as a diagnostic and prognostic biomarker in colorectal cancer
Source: PubMed Central journal article supplement (PMC4640217; doi:10.1186/s12943-015-0455-5), 2015-11-09
Supplement: 12943_2015_455_MOESM3_ESM.pdf [file 12943_2015_455_MOESM3_ESM.pdf]

**Table S2. Correlation of NEAT1 expression between blood and matched tissues in patients with simultaneously surgery for primary cancer and hepatic metastasis**

| <b>Correlation of NEAT1 expression between blood and matched tissues</b> |                      |                 |                           |                 |                           |                 |
|--------------------------------------------------------------------------|----------------------|-----------------|---------------------------|-----------------|---------------------------|-----------------|
|                                                                          | <b>Tumor Tissues</b> |                 | <b>Para-Tumor Tissues</b> |                 | <b>Hepatic Meatstasis</b> |                 |
|                                                                          | <b>NEAT1_v1</b>      | <b>NEAT1_v2</b> | <b>NEAT1_v1</b>           | <b>NEAT1_v2</b> | <b>NEAT1_v1</b>           | <b>NEAT1_v2</b> |
| <b>p value</b>                                                           | 0.998                | 0.904           | 0.643                     | 0.206           | 0.656                     | 0.901           |
| <b>Blood Pearson</b>                                                     | -0.001               | 0.044           | 0.168                     | -0.437          | 0.161                     | 0.045           |
| <b>Correlation</b>                                                       |                      |                 |                           |                 |                           |                 |

Blood and matched tissues were collected from 19 patients with simultaneously surgery.

Correlation analysis was performed. Pearson correlation and p-value was present in the table.
