# Supplementary material for: Nuclear-enriched abundant transcript 1 as a diagnostic and prognostic biomarker in colorectal cancer
Source: PubMed Central journal article supplement (PMC4640217; doi:10.1186/s12943-015-0455-5), 2015-11-09
Supplement: 12943_2015_455_MOESM6_ESM.pdf [file 12943_2015_455_MOESM6_ESM.pdf]

**Table S3. Characteristics of the CRC and control populations.**  
**Supplementary Table S1**

| Characteristics of the CRC and control populations |             |            |              |             |                                 |              |            |
|----------------------------------------------------|-------------|------------|--------------|-------------|---------------------------------|--------------|------------|
| Variable                                           | Screening   |            | Validation   |             | Clinical                        | Immune Cells |            |
|                                                    | CRC<br>n=30 | NC<br>n=30 | CRC<br>n=100 | NC<br>n=100 | Variables Study<br>CRC<br>n=191 | CRC<br>n=24  | NC<br>n=12 |
| Age,y                                              |             |            |              |             |                                 |              |            |
| Mean                                               | 56.1        | 56.3       | 56.3         | 56.2        | 55.5                            | 51.1         | 47.6       |
| Range                                              | 27-78       | 38-74      | 36-78        | 32-74       | 24-77                           | 32-72        | 25-56      |
| Gender, no. (%)                                    |             |            |              |             |                                 |              |            |
| Male                                               | 15(50.0)    | 15(50.0)   | 54(54.0)     | 35(35.0)    | 101(52.8)                       | 12(50.0)     | 6(50.0)    |
| Female                                             | 15(50.0)    | 15(50.0)   | 46(46.0)     | 65(65.0)    | 90(47.2)                        | 12(50.0)     | 6(50.0)    |
| Tumor Site, no. (%)                                |             |            |              |             |                                 |              |            |
| Colon                                              | 10(33.3)    |            | 43(43.0)     |             | 59(30.9)                        | 10(41.7)     |            |
| Rectum                                             | 20(66.7)    |            | 57(57.0)     |             | 132(69.1)                       | 14(58.3)     |            |
| Tumor Stage, no. (%)                               |             |            |              |             |                                 |              |            |
| Stage I                                            | 3(10.0)     |            | 10(10.0)     |             | 16(8.3)                         | 6(25.0)      |            |
| Stage II                                           | 12(40.0)    |            | 32(32.0)     |             | 78(40.8)                        | 6(25.0)      |            |
| Stage III                                          | 11(36.7)    |            | 40(40.0)     |             | 76(39.8)                        | 6(25.0)      |            |
| Stage IV                                           | 4(13.3)     |            | 18(18.0)     |             | 21(11.1)                        | 6(25.0)      |            |
