# Supplementary material for: Nuclear-enriched abundant transcript 1 as a diagnostic and prognostic biomarker in colorectal cancer
Source: PubMed Central journal article supplement (PMC4640217; doi:10.1186/s12943-015-0455-5), 2015-11-09
Supplement: 12943_2015_455_MOESM7_ESM.pdf [file 12943_2015_455_MOESM7_ESM.pdf]

**Table S4. Primer sequences for NEAT1 and reference genes**

|                                 |                        |
|---------------------------------|------------------------|
| <b>NEAT1_v1</b>                 |                        |
| Forward                         | GTAGTTCAGTTCTTAACCAATG |
| Reverse                         | CCATACAGAGCAACATACC    |
| <b>NEAT1_v2</b>                 |                        |
| Forward                         | CAGAGACACAGGCATTCA     |
| Reverse                         | GACTACACTCCTTGGTAACT   |
| <b>DEC1</b>                     |                        |
| Forward                         | CGATGCTACCACCTAATAGT   |
| Reverse                         | TAGGCTGGACAGAAGAGT     |
| <b><math>\beta</math>-ACTIN</b> |                        |
| Forward                         | TGTCCACCTTCCAGCAGAT    |
| Reverse                         | GCCATGCCAATCTCATCTTGT  |
