# Supplementary material for: Nuclear-enriched abundant transcript 1 as a diagnostic and prognostic biomarker in colorectal cancer
Source: Springer Nature journal article supplement (doi:10.1186/s12943-015-0455-5), 2015-11-09
Supplement: MOESM4 [file 9763250]

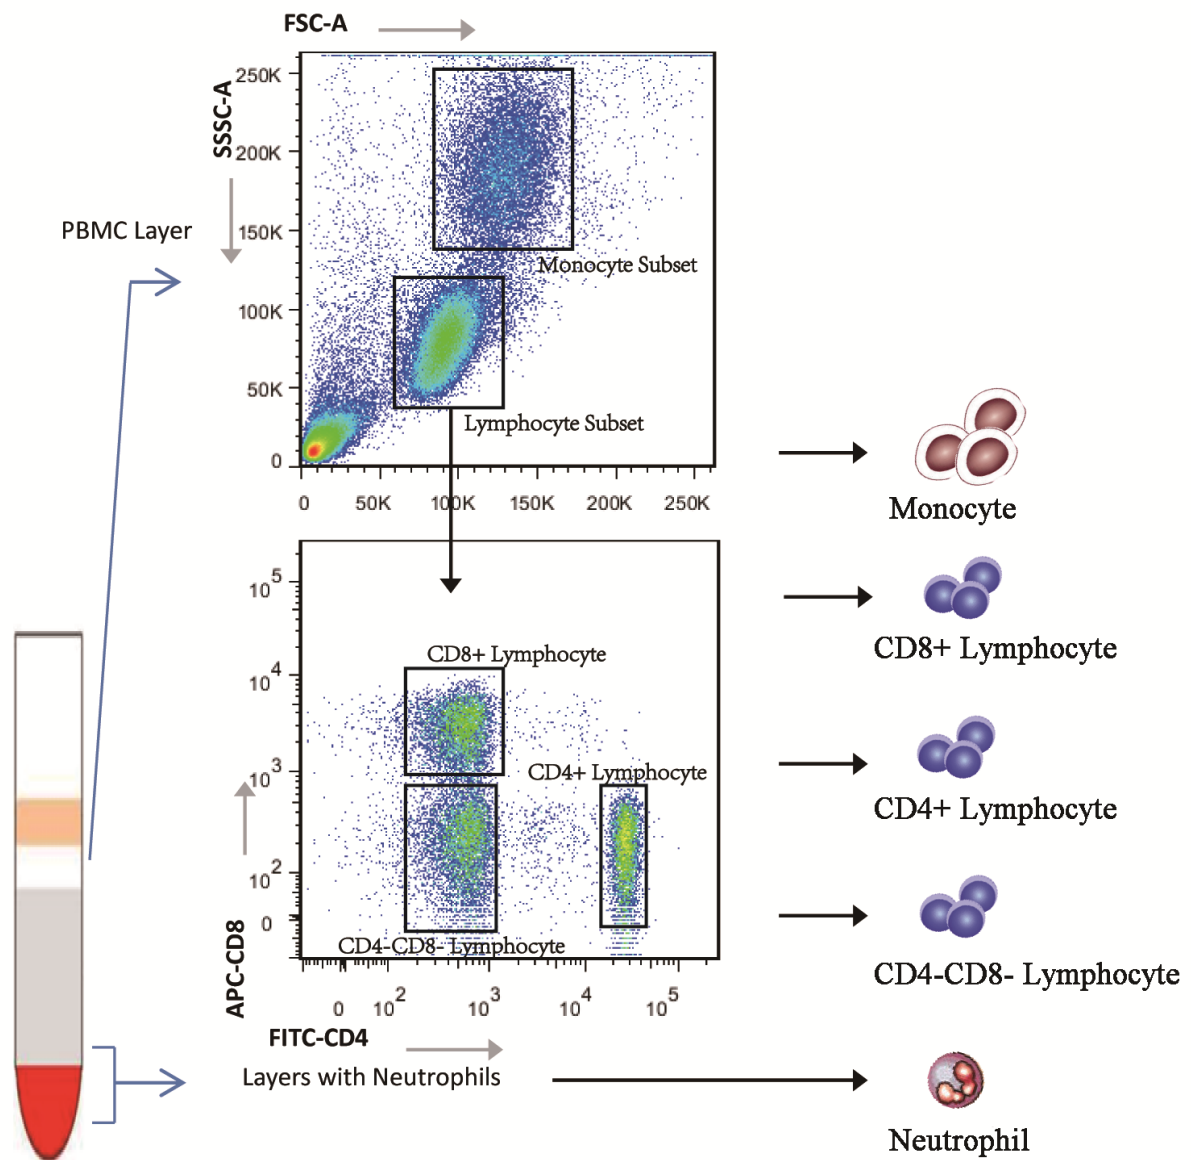

**Figure S2. 5 groups of immune cells separated from peripheral blood from patients and healthy donors.** Neutrophils were isolated using improved Ficoll Solution. Monocytes, CD4+Lymphocytes, CD8+ Lymphocytes, and CD4-CD8- Lymphocytes were isolated from peripheral blood mononuclear cells by fluorescence-activated cell sorting with anti-CD4 and anti-CD8 monoclonal antibodies.
